# Supplementary material for: Vagal Sensing of Altered Gut Microbiota Links to Externalizing Behaviors
Source: Research Square preprint supplement (doi:10.21203/rs.3.rs-8760936/v1), 2026-02-09
Supplement: Supplementary file 2 [file 410bc5a6d1d1063468da1162.pdf]

## Sirt3 WT, KO mice\_Plasma

| metabolites                             | plasma_WT 1 | plasma_WT 2 | plasma_WT 3 | plasma_KO 1 | plasma_KO 2 | plasma_KO 3 |
|-----------------------------------------|-------------|-------------|-------------|-------------|-------------|-------------|
| (R)-(+)-2-Pyrrolidone-5-carboxylic acid | 981689.8    | 740929.1    | 597636.6    | 827441.8    | 1302559     | 884066.4    |
| 2-aminobutyrate                         | 18572.57    | 8498.451    | 18365.7     | 14283.07    | 18784.03    | 22759.8     |
| 2-Aminooctanoic acid                    | 7970.539    | 13557.13    | 14066.35    | 6698.884    | 8727.81     | 6385.055    |
| 2-Deoxy-D-ribose                        | 5336.591    | 3087.864    | 2250.485    | 3655.814    | 4413.024    | 3542.238    |
| 2-hydroxyglutarate                      | 32037.21    | 33936.06    | 36561.33    | 30889.48    | 40818.45    | 66485.2     |
| 2-Hydroxyoctanoic acid                  | 307307.9    | 204568      | 185908.5    | 230527.8    | 116341.1    | 47354.34    |
| 2-Hydroxyvaleric acid                   | 6908612     | 7073862     | 4715512     | 7547394     | 8104358     | 1.13E+07    |
| 2-Ketobutyric acid                      | 595345      | 513255.9    | 709648.7    | 790627      | 780862.6    | 600780      |
| 2-Methylglutaric acid                   | 22403.78    | 21292.95    | 28679.31    | 26649.13    | 36700.86    | 22111.96    |
| 2-Oxoisopentanoic acid                  | 2.22E+07    | 1.50E+07    | 1.45E+07    | 1.56E+07    | 1.65E+07    | 1.29E+07    |
| 2-Phenylbutyric acid                    | 5222.349    | 5206.839    | 3354.736    | 3272.917    | 4124.601    | 1757.602    |
| 2-Phenylpropionic acid                  | 170657.1    | 867087.9    | 3312667     | 1729358     | 464813.9    | 1618513     |
| 3-hydroxybutyrate                       | 3414949     | 2425834     | 8493655     | 5641362     | 1788991     | 2236415     |
| 3-Hydroxypropionic Acid                 | 8.73E+07    | 8.43E+07    | 1.21E+08    | 9.34E+07    | 8.99E+07    | 1.04E+08    |
| 3-Indolepropionic acid                  | 46119.8     | 152852.6    | 364156.4    | 253171.6    | 276924.4    | 179899.3    |
| 3-Methylglutaconic Acid                 | 3127156     | 3269167     | 4441882     | 3891341     | 4956022     | 4033912     |
| 3-Methylglutaric acid                   | 22403.78    | 21292.95    | 28679.31    | 26649.13    | 36700.86    | 22111.96    |
| 3-ureidopropionate                      | 60602.09    | 22140.59    | 74810.32    | 20846.96    | 138350.2    | 58364.27    |
| 4-aminobutyrate                         | 15521.34    | 12943.37    | 15642.12    | 10694.3     | 22999.26    | 25867.58    |
| 4-Methylvaleric acid                    | 372349      | 293259.3    | 360061.5    | 291882.7    | 262454.2    | 221000.5    |
| 5-aminovaleric acid                     | 3676734     | 2416428     | 5523448     | 2972951     | 3326575     | 4443042     |
| 5-Keto-D-gluconic acid                  | 40092.96    | 24246.65    | 49544.16    | 40983.34    | 64116.92    | 46635.15    |
| acetoacetate                            | 508817.1    | 379775.3    | 494877.9    | 494872      | 511233.5    | 341249.7    |
| aconitate                               | 761241.2    | 675509.9    | 963807.5    | 955910.3    | 968031.2    | 1290576     |
| adenine                                 | 4471.119    | 7307.705    | 5241.461    | 6360.908    | 6110.658    | 0           |
| Adipic acid                             | 22403.78    | 21292.95    | 28679.31    | 26649.13    | 36700.86    | 22111.96    |
| Adonitol                                | 15258.62    | 14074.81    | 21860.8     | 15580.86    | 17861.51    | 29033.67    |
| a-ketoglutarate                         | 411904.8    | 403442.5    | 452343.6    | 354728.4    | 532587.5    | 243364.2    |
| alanine                                 | 3354392     | 2171773     | 2900068     | 2062373     | 2904945     | 3163339     |
| allantoin                               | 3287502     | 1776844     | 3431524     | 1784155     | 2937535     | 3173449     |
| Amino adipic acid                       | 33195.18    | 18256.22    | 27936.79    | 27879.93    | 51269.62    | 33554.42    |
| Aminolevulinic acid                     | 34139.29    | 24047.79    | 29226.17    | 24282.24    | 64939.5     | 59450.86    |
| anserine                                | 126141.5    | 94684.29    | 98899.78    | 62323.64    | 91124.35    | 117331.9    |
| arginine                                | 209944.8    | 103903.3    | 192029      | 306618.3    | 492402      | 421029.8    |
| asparagine                              | 327341.5    | 226893.3    | 369730.3    | 209981.3    | 369249.6    | 500200      |
| aspartate                               | 70198.07    | 47149.04    | 39740.59    | 61763.61    | 91160.09    | 106880.9    |
| b-alanine                               | 3354392     | 2171773     | 2900068     | 2062373     | 2904945     | 3163339     |
| betaine                                 | 3676734     | 2416428     | 5523448     | 2972951     | 3326575     | 4443042     |
| Capryloyl glycine                       | 100108.4    | 125431.2    | 72445.84    | 23445.25    | 54568.92    | 61635.31    |
| Carbamoyl phosphate                     | 122623.6    | 80428.16    | 82089.24    | 94954.9     | 87755.16    | 103381.5    |
| carnosine                               | 172105.9    | 139154      | 80631.48    | 60578.09    | 146220.9    | 138956.3    |
| cellobiose                              | 28897.19    | 32065.76    | 83235.99    | 30866.32    | 44527.46    | 40991.66    |
| Cholic acid                             | 1058606     | 41240.72    | 375613.8    | 81654.41    | 513096.6    | 179026.3    |
| Citramalic acid                         | 116628      | 106739.2    | 150447.4    | 100737.2    | 128395.4    | 97057.22    |
| citrate                                 | 155682.2    | 154020.9    | 264806.3    | 220028.2    | 223131.2    | 286108.4    |
| citrulline                              | 558053.1    | 486823.1    | 770852.2    | 446969.7    | 730762      | 681176.6    |
| creatine                                | 1143357     | 726252      | 817618.2    | 712379.7    | 915787.5    | 796696.8    |
| Creatinine                              | 377510.6    | 288084.1    | 391072      | 259763.7    | 435763.3    | 394494.7    |
| Cyclic-ADP-ribose                       | 62828.61    | 57818.75    | 41316.39    | 50363.54    | 67288.44    | 38343.54    |
| cyclic-IMP                              | 636209.2    | 515357.2    | 454167.3    | 1238844     | 906956      | 729482.8    |
| Cysteine-glutathione disulphide         | 35146.43    | 22834.81    | 68788.95    | 23978.34    | 36295.27    | 234913.2    |
| Cystine                                 | 2251.828    | 764.0213    | 6090.682    | 3345.094    | 893.0056    | 23208.73    |
| cytidine                                | 59156.91    | 56958.46    | 69637.2     | 89657.26    | 62724.45    | 61468.54    |
| D-Arabitol                              | 15258.62    | 14074.81    | 21860.8     | 15580.86    | 17861.51    | 29033.67    |
| D-Fructose                              | 1.28E+07    | 1.38E+07    | 1.58E+07    | 1.65E+07    | 2.10E+07    | 1.77E+07    |
| dihydroorotate                          | 3218.25     | 3598.449    | 3191.199    | 3971.444    | 1999.354    | 5877.501    |
| dimethylglycine                         | 15521.34    | 12943.37    | 15642.12    | 10694.3     | 22999.26    | 25867.58    |
| D-mannose 6-phosphate                   | 47780.52    | 29190.32    | 14097.05    | 24057.18    | 25585.45    | 58392.25    |
| fructose-6-phosphate                    | 47780.52    | 29190.32    | 14097.05    | 24057.18    | 25585.45    | 58392.25    |
| fumarate                                | 178548.8    | 90315.16    | 357723.9    | 205192.3    | 293803.7    | 190620.9    |
| Galactose                               | 1.28E+07    | 1.38E+07    | 1.58E+07    | 1.65E+07    | 2.10E+07    | 1.77E+07    |
| Galacturonic acid                       | 120042.9    | 74571.16    | 88331.66    | 67599.84    | 90389.3     | 124335.5    |
| glucose-1-phosphate                     | 47780.52    | 29190.32    | 14097.05    | 24057.18    | 25585.45    | 58392.25    |

|                          |          |          |          |          |          |          |
|--------------------------|----------|----------|----------|----------|----------|----------|
| glucose-6-phosphate      | 47780.52 | 29190.32 | 14097.05 | 24057.18 | 25585.45 | 58392.25 |
| Glutaconic acid          | 241157.2 | 209838.7 | 311575.7 | 312100.2 | 328898.5 | 459660.2 |
| glutamate                | 763452.9 | 609382.4 | 619263.4 | 761769.4 | 854587.2 | 1035786  |
| glutamine                | 4302504  | 4511728  | 6445120  | 6195112  | 6070974  | 6394166  |
| Glutaric acid            | 1223946  | 1288767  | 1707114  | 1489803  | 1941283  | 1594866  |
| glutathione disulfide    | 61910.41 | 58479.09 | 41089.88 | 25741.73 | 29926.63 | 78679.75 |
| glycerate                | 30327.88 | 22457.51 | 28223.92 | 23734.2  | 43025.66 | 40162.71 |
| glycine                  | 644935.8 | 468714.1 | 611378.8 | 514490.2 | 634776.2 | 636699.4 |
| glycolate                | 725673.5 | 704429.4 | 854514   | 889047.8 | 1056901  | 816525.3 |
| glyoxylate               | 67637.71 | 68003.75 | 77202.62 | 71538.03 | 99611.87 | 78768.6  |
| histidine                | 160885.8 | 125268.1 | 138447   | 141827.2 | 200889.9 | 171293.3 |
| Homocarnosine            | 126141.5 | 94684.29 | 98899.78 | 62323.64 | 91124.35 | 117331.9 |
| homocysteic acid         | 459256   | 450774   | 491144   | 585091.5 | 495967   | 437980.9 |
| homoserine               | 607141.8 | 346572.2 | 760359.4 | 376843.4 | 653301.3 | 660594.4 |
| hydroxyphenylpyruvate    | 1592594  | 1284612  | 2920757  | 1546420  | 1604649  | 1834456  |
| hydroxyproline           | 34139.29 | 24047.79 | 29226.17 | 24282.24 | 64939.5  | 59450.86 |
| hypoxanthine             | 3015.211 | 1740.968 | 3636.945 | 2381.318 | 2291.523 | 1452.702 |
| Imidazoleacetic acid     | 297251.4 | 234215.8 | 245365.7 | 366021.7 | 679500.3 | 362240   |
| Indole-2-carboxylic acid | 62876.28 | 72232.9  | 102557.9 | 119129.9 | 99544.59 | 58551.03 |
| Indole-3-acetaldehyde    | 3149708  | 3655958  | 5013342  | 4150223  | 3836762  | 3499797  |
| Indole-3-lactic acid     | 240218.7 | 271731.6 | 447125.9 | 304689.5 | 261239.7 | 290656.5 |
| Indole-3-pyruvic acid    | 687350.8 | 604967.4 | 895564.2 | 676476.7 | 723202.6 | 546788.3 |
| inosine                  | 6763.847 | 8017.469 | 9990.821 | 9568.648 | 8199.763 | 7958.994 |
| isoleucine               | 1895128  | 1375871  | 3300269  | 1760673  | 2033293  | 2562532  |
| ketoleucine              | 1.15E+07 | 8597229  | 1.22E+07 | 1.44E+07 | 1.42E+07 | 9783399  |
| lactate                  | 8.73E+07 | 8.43E+07 | 1.21E+08 | 9.34E+07 | 8.99E+07 | 1.04E+08 |
| Lactose                  | 28897.19 | 32065.76 | 83235.99 | 30866.32 | 44527.46 | 40991.66 |
| leucine                  | 2677588  | 2104073  | 4699762  | 2887558  | 3458847  | 4329508  |
| L-Fucose                 | 70677.09 | 102983.7 | 110429.6 | 136224.1 | 94925.96 | 131156.9 |
| L-Hydroxyproline         | 34955.62 | 28898.19 | 36207.46 | 23782.08 | 41305.98 | 59933.06 |
| Linoleic acid            | 1.11E+09 | 7.90E+08 | 8.24E+08 | 1.06E+09 | 9.14E+08 | 4.11E+08 |
| Lipoic acid              | 6928.445 | 2785.259 | 3485.311 | 2915.743 | 2847.731 | 8284.042 |
| Lithocholic acid         | 47060    | 16811.37 | 40025.55 | 19157.31 | 11370.18 | 3609.414 |
| L-norvaline              | 3676734  | 2416428  | 5523448  | 2972951  | 3326575  | 4443042  |
| L-Rhamnose               | 70677.09 | 102983.7 | 110429.6 | 136224.1 | 94925.96 | 131156.9 |
| L-Threonic acid          | 69500.9  | 62176.51 | 80031.07 | 53769.88 | 68527.75 | 82250.68 |
| lysine                   | 423094.5 | 286355.5 | 393740.5 | 375532.1 | 561387.8 | 536224.7 |
| malate                   | 642473.1 | 436463.9 | 1285597  | 830301.6 | 1299809  | 878397.8 |
| Malonic acid             | 227891.8 | 160115   | 305549.2 | 337200.7 | 332827.1 | 354766.3 |
| Mannose                  | 1.28E+07 | 1.38E+07 | 1.58E+07 | 1.65E+07 | 2.10E+07 | 1.77E+07 |
| methionine               | 546635.6 | 358280.4 | 563383.4 | 395523.9 | 530356   | 598107.4 |
| Methionine sulfoxide     | 10150.57 | 6186.503 | 12664.1  | 12792.81 | 17216.38 | 27422.09 |
| Methylmalonic acid       | 3223741  | 2388007  | 2777331  | 2343722  | 2456674  | 1680375  |
| myo-inositol             | 152254   | 114281   | 139901.8 | 99804.91 | 119878.1 | 196122   |
| Myristic acid            | 1.35E+07 | 1.25E+07 | 7594014  | 8121280  | 3802840  | 2644438  |
| N2-methylguanosine       | 36387.71 | 17641.52 | 40332.22 | 39748.42 | 33569.61 | 38736.39 |
| N-Acetylaspartic acid    | 93498.79 | 64103.43 | 66669.19 | 50285.48 | 83251.96 | 96427.56 |
| N-acetyl-glutamate       | 14654.83 | 9995.177 | 28553.97 | 17767.41 | 18150.74 | 37865.2  |
| N-acetyl-glutamine       | 32270    | 22122.13 | 34971.73 | 23871.87 | 22966.9  | 40802.57 |
| N-Acetylglycine          | 197037.3 | 165413.8 | 234026.9 | 229283.9 | 128934.1 | 151669.4 |
| N-Acetyl-L-alanine       | 34955.62 | 28898.19 | 36207.46 | 23782.08 | 41305.98 | 59933.06 |
| N-Acetyl-L-asparagine    | 44492.51 | 24984.3  | 44860.88 | 25784.49 | 18096.2  | 32674.77 |
| N-Acetyl-L-isoleucine    | 110052.5 | 81085.41 | 329929   | 122542   | 127945.9 | 193549.3 |
| N-Acetyl-L-methionine    | 28168.06 | 22451.88 | 37404.66 | 12193.18 | 20253.66 | 22849.03 |
| N-acetyl-L-ornithine     | 38107.9  | 25151.19 | 55320.25 | 34517.2  | 39387.42 | 57092.1  |
| N-acetyl-L-phenylalanine | 97983.41 | 162364.8 | 468633.5 | 137951.4 | 73098.02 | 217849.7 |
| N-Acetyl-L-serine        | 12823.72 | 8657.042 | 10612.32 | 10727.04 | 14225.66 | 13397.87 |
| N-Acetylneuraminic acid  | 10571.15 | 6834.819 | 8846.109 | 5236.097 | 14947.83 | 12549.61 |
| NADPH                    | 10606.8  | 10440.47 | 9102.065 | 9703.253 | 8113.622 | 10539.98 |
| N-Butyrylglycine         | 102859.4 | 86242.71 | 154234.6 | 61881.41 | 35750.63 | 52220.72 |
| N-Iso valerylglycine     | 169841.5 | 90058.99 | 225676.2 | 76814.47 | 75693.6  | 90479.98 |
| N-Methyl-D-aspartic acid | 763452.9 | 609382.4 | 619263.4 | 761769.4 | 854587.2 | 1035786  |
| N-Tiglylglycine          | 15640.99 | 9968.501 | 26365.1  | 12707.29 | 8445.088 | 12402.23 |
| O-acetyl-L-serine        | 12823.72 | 8657.042 | 10612.32 | 10727.04 | 14225.66 | 13397.87 |
| O-Phosphorylethanolamine | 11457.47 | 8165.797 | 9157.796 | 5194.4   | 7146.838 | 17681.48 |

|                         |          |          |          |          |          |          |
|-------------------------|----------|----------|----------|----------|----------|----------|
| ornithine               | 72862.59 | 71769.62 | 105261.1 | 55763.79 | 83280.27 | 105696   |
| orotate                 | 107522.8 | 61792.32 | 102784   | 72842.48 | 126426.7 | 111535.1 |
| pantothenate            | 80459.97 | 58800.49 | 201123   | 218525.7 | 66342.7  | 54155.23 |
| p-Cresol                | 22650.17 | 7605.48  | 32602.5  | 18400.36 | 15815.87 | 13130    |
| phenylacetyl glutamine  | 791.0923 | 540.5267 | 532.1081 | 0        | 662.8441 | 0        |
| phenylalanine           | 1242482  | 939667.8 | 1489166  | 1175794  | 1268886  | 1666322  |
| Phenyllactic acid       | 156689.1 | 145395.3 | 206771.8 | 111382.5 | 131661.2 | 293492.2 |
| Pipecolic acid          | 41350.54 | 32372.82 | 32645.4  | 26673.07 | 39393.29 | 44787.89 |
| proline                 | 906834.1 | 692225.7 | 1212371  | 791894.6 | 1538514  | 1582690  |
| pseudouridine           | 61731.59 | 84057.63 | 506305.2 | 613920.7 | 188160   | 108273.8 |
| Pyroglutamic acid       | 981689.8 | 740929.1 | 597636.6 | 827441.8 | 1302559  | 884066.4 |
| pyruvate                | 4.99E+07 | 4.57E+07 | 3.14E+07 | 3.53E+07 | 6.23E+07 | 5.38E+07 |
| Quinic acid             | 2995.973 | 1995.697 | 3323.466 | 0        | 2829.943 | 1966.279 |
| Ribose                  | 546696.7 | 585514.3 | 851807.8 | 709001.8 | 935056.7 | 715650.6 |
| ribose-5-phosphate      | 2042.873 | 972.1364 | 579.27   | 2786.239 | 0        | 10402    |
| Ribothymidine           | 4630.667 | 5713.986 | 7068.021 | 3276.3   | 5670.715 | 2458.604 |
| sarcosine               | 3354392  | 2171773  | 2900068  | 2062373  | 2904945  | 3163339  |
| Sebacic acid            | 123651.1 | 80504.95 | 175959.4 | 59943.48 | 208926.9 | 50663.89 |
| serine                  | 468714.3 | 388696.2 | 435236.4 | 229648.9 | 490935.8 | 483021.2 |
| sn-glycerol-3-phosphate | 219342.6 | 251924.6 | 118009.5 | 105381.1 | 120003.1 | 61341.62 |
| sorbitol                | 11345.06 | 7481.069 | 11703.25 | 6053.095 | 10355.24 | 10008.81 |
| Stearic acid            | 4.19E+08 | 3.89E+08 | 3.92E+08 | 3.55E+08 | 4.07E+08 | 2.58E+08 |
| succinate               | 3223741  | 2388007  | 2777331  | 2343722  | 2456674  | 1680375  |
| sucrose                 | 29367.98 | 55583.71 | 30935.36 | 44380.89 | 65848.79 | 72571.87 |
| taurine                 | 1.43E+07 | 1.17E+07 | 1.33E+07 | 1.08E+07 | 1.07E+07 | 9870473  |
| Taurodeoxycholic acid   | 1892188  | 936608.4 | 1194691  | 1348344  | 714697.9 | 861721.1 |
| threonine               | 607141.8 | 346572.2 | 760359.4 | 376843.4 | 653301.3 | 660594.4 |
| thymine                 | 297251.4 | 234215.8 | 245365.7 | 366021.7 | 679500.3 | 362240   |
| trans-urocanic acid     | 32631.67 | 17957.27 | 11396.29 | 11413.67 | 103984.4 | 18729.12 |
| Tricarballic acid       | 65126.97 | 10692.4  | 39939.6  | 20822.16 | 39444.56 | 80299.03 |
| tropic acid             | 26778.16 | 1236.037 | 6306.475 | 3118.075 | 6190.34  | 3731.208 |
| tryptophan              | 541295.1 | 651770.6 | 1119822  | 847849   | 889318.3 | 628852.6 |
| tyrosine                | 123763.9 | 84266    | 168439.8 | 132343.5 | 137462.3 | 144076.5 |
| Undecanoic acid         | 28156.72 | 19991.43 | 39360.51 | 29203.66 | 37948.95 | 24241.17 |
| uridine                 | 61731.59 | 84057.63 | 506305.2 | 613920.7 | 188160   | 108273.8 |
| valine                  | 3676734  | 2416428  | 5523448  | 2972951  | 3326575  | 4443042  |

**Sirt3 WT, KO mice\_Plasma**

A student's t test (unpaired) was used for statistical analysis.

| <b>Metabolites</b>                      | <b>p-value</b> | <b>mean_plasma_KO</b> | <b>mean_plasma_WT</b> | <b>Fold change</b> |
|-----------------------------------------|----------------|-----------------------|-----------------------|--------------------|
| (R)-(+)-2-Pyrrolidone-5-carboxylic acid | 0.284040036    | 1004689.067           | 773418.5              | 1.299023836        |
| 2-aminobutyrate                         | 0.448742886    | 18608.96667           | 15145.57367           | 1.22867361         |
| 2-Aminooctanoic acid                    | 0.092420461    | 7270.583              | 11864.673             | 0.612792531        |
| 2-Deoxy-D-ribose                        | 0.761695497    | 3870.358667           | 3558.313333           | 1.087694732        |
| 2-hydroxyglutarate                      | 0.328340478    | 46064.37667           | 34178.2               | 1.347770704        |
| 2-Hydroxyoctanoic acid                  | 0.196729544    | 131407.7467           | 232594.8              | 0.56496425         |
| 2-Hydroxyvaleric acid                   | 0.119765941    | 8983917.333           | 6232662               | 1.441425403        |
| 2-Ketobutyric acid                      | 0.232662686    | 724089.8667           | 606083.2              | 1.194703741        |
| 2-Methylglutaric acid                   | 0.422407261    | 28487.31667           | 24125.34667           | 1.180804449        |
| 2-Oxoisopentanoic acid                  | 0.456569101    | 15000000              | 17233333.33           | 0.87040619         |
| 2-Phenylbutyric acid                    | 0.172165457    | 3051.706667           | 4594.641333           | 0.664188224        |
| 2-Phenylpropionic acid                  | 0.870914256    | 1270894.967           | 1450137.333           | 0.876396282        |
| 3-hydroxybutyrate                       | 0.525343889    | 3222256               | 4778146               | 0.674373701        |
| 3-Hydroxypropionic Acid                 | 0.894485314    | 95766666.67           | 97533333.33           | 0.981886535        |
| 3-Indolepropionic acid                  | 0.643308681    | 236665.1              | 187709.6              | 1.260804455        |
| 3-Methylglutaconic Acid                 | 0.271041273    | 4293758.333           | 3612735               | 1.188506307        |
| 3-Methylglutaric acid                   | 0.422407261    | 28487.31667           | 24125.34667           | 1.180804449        |
| 3-ureidopropionate                      | 0.626938995    | 72520.47667           | 52517.66667           | 1.380877736        |
| 4-aminobutyrate                         | 0.337912474    | 19853.71333           | 14702.27667           | 1.350383603        |
| 4-Methylvaleric acid                    | 0.059769456    | 258445.8              | 341889.9333           | 0.755932757        |
| 5-aminovaleric acid                     | 0.786327141    | 3580856               | 3872203.333           | 0.924759289        |
| 5-Keto-D-gluconic acid                  | 0.281582315    | 50578.47              | 37961.25667           | 1.332370802        |
| acetoacetate                            | 0.867789228    | 449118.4              | 461156.7667           | 0.973895283        |
| aconitate                               | 0.12264568     | 1071505.833           | 800186.2              | 1.339070623        |
| adenine                                 | 0.536573308    | 4157.188667           | 5673.428333           | 0.73274719         |
| Adipic acid                             | 0.422407261    | 28487.31667           | 24125.34667           | 1.180804449        |
| Adonitol                                | 0.478082002    | 20825.34667           | 17064.74333           | 1.220372687        |
| a-ketoglutarate                         | 0.621795785    | 376893.3667           | 422563.6333           | 0.891920972        |
| alanine                                 | 0.846973694    | 2710219               | 2808744.333           | 0.964921929        |
| allantoin                               | 0.783466441    | 2631713               | 2831956.667           | 0.929291409        |
| Amino adipic acid                       | 0.251519321    | 37567.99              | 26462.73              | 1.419656627        |
| Aminolevulinic acid                     | 0.193119566    | 49557.53333           | 29137.75              | 1.700801652        |
| anserine                                | 0.432101091    | 90259.96333           | 106575.19             | 0.846913464        |
| arginine                                | 0.019720007    | 406683.3667           | 168625.4333           | 2.411755799        |
| asparagine                              | 0.610757034    | 359810.3              | 307988.3667           | 1.168259386        |
| aspartate                               | 0.100455091    | 86601.53333           | 52362.56667           | 1.653882513        |
| b-alanine                               | 0.846973694    | 2710219               | 2808744.333           | 0.964921929        |
| betaine                                 | 0.786327141    | 3580856               | 3872203.333           | 0.924759289        |
| Capryloyl glycine                       | 0.05204108     | 46549.82667           | 99328.48              | 0.468645314        |
| Carbamoyl phosphate                     | 0.983631626    | 95363.85333           | 95047                 | 1.003333649        |
| carnosine                               | 0.708580751    | 115251.7633           | 130630.46             | 0.882273272        |
| cellobiose                              | 0.635087856    | 38795.14667           | 48066.31333           | 0.807117167        |
| Cholic acid                             | 0.513538784    | 257925.77             | 491820.1733           | 0.52443105         |
| Citramalic acid                         | 0.391001162    | 108729.94             | 124604.8667           | 0.87259786         |
| citrate                                 | 0.291682389    | 243089.2667           | 191503.1333           | 1.269374879        |
| citrulline                              | 0.911930181    | 619636.1              | 605242.8              | 1.023781035        |
| creatine                                | 0.565150658    | 808288                | 895742.4              | 0.902366573        |
| Creatinine                              | 0.866802423    | 363340.5667           | 352222.2333           | 1.031566245        |
| Cyclic-ADP-ribose                       | 0.860482817    | 51998.50667           | 53987.91667           | 0.963150829        |
| cyclic-IMP                              | 0.055876125    | 958427.6              | 535244.5667           | 1.790634898        |
| Cysteine-glutathione disulphide         | 0.465824693    | 98395.60333           | 42256.73              | 2.32851911         |
| Cystine                                 | 0.446074792    | 9148.9432             | 3035.510433           | 3.013971917        |
| cytidine                                | 0.40163513     | 71283.41667           | 61917.52333           | 1.151264018        |
| D-Arabitol                              | 0.478082002    | 20825.34667           | 17064.74333           | 1.220372687        |

|                          |             |             |             |             |
|--------------------------|-------------|-------------|-------------|-------------|
| D-Fructose               | 0.056844197 | 18400000    | 14133333.33 | 1.301886792 |
| dihydroorotate           | 0.615215375 | 3949.433    | 3335.966    | 1.18389486  |
| dimethylglycine          | 0.337912474 | 19853.71333 | 14702.27667 | 1.350383603 |
| D-mannose 6-phosphate    | 0.722546968 | 36011.62667 | 30355.96333 | 1.186311443 |
| fructose-6-phosphate     | 0.722546968 | 36011.62667 | 30355.96333 | 1.186311443 |
| fumarate                 | 0.816982071 | 229872.3    | 208862.62   | 1.100590905 |
| Galactose                | 0.056844197 | 18400000    | 14133333.33 | 1.301886792 |
| Galacturonic acid        | 0.992704597 | 94108.21333 | 94315.24    | 0.99780495  |
| glucose-1-phosphate      | 0.722546968 | 36011.62667 | 30355.96333 | 1.186311443 |
| glucose-6-phosphate      | 0.722546968 | 36011.62667 | 30355.96333 | 1.186311443 |
| Glutaconic acid          | 0.112142609 | 366886.3    | 254190.5333 | 1.443351549 |
| glutamate                | 0.080675362 | 884047.5333 | 664032.9    | 1.331330923 |
| glutamine                | 0.174990657 | 6220084     | 5086450.667 | 1.22287316  |
| Glutaric acid            | 0.257745591 | 1675317.333 | 1406609     | 1.191032713 |
| glutathione disulfide    | 0.644842202 | 44782.70333 | 53826.46    | 0.831983068 |
| glycerate                | 0.251816557 | 35640.85667 | 27003.10333 | 1.319880024 |
| glycine                  | 0.778372836 | 595321.9333 | 575009.5667 | 1.035325267 |
| glycolate                | 0.13504465  | 920824.7    | 761538.9667 | 1.209162945 |
| glyoxylate               | 0.240727381 | 83306.16667 | 70948.02667 | 1.174185817 |
| histidine                | 0.209877072 | 171336.8    | 141533.6333 | 1.210573035 |
| Homocarnosine            | 0.432101091 | 90259.96333 | 106575.19   | 0.846913464 |
| homocysteic acid         | 0.427290301 | 506346.4667 | 467058      | 1.084119032 |
| homoserine               | 0.961812223 | 563579.7    | 571357.8    | 0.986386639 |
| hydroxyphenylpyruvate    | 0.623286829 | 1661841.667 | 1932654.333 | 0.85987527  |
| hydroxyproline           | 0.193119566 | 49557.53333 | 29137.75    | 1.700801652 |
| hypoxanthine             | 0.297442374 | 2041.847667 | 2797.708    | 0.729828726 |
| Imidazoleacetic acid     | 0.120554844 | 469254      | 258944.3    | 1.81218123  |
| Indole-2-carboxylic acid | 0.572723537 | 92408.50667 | 79222.36    | 1.16644476  |
| Indole-3-acetaldehyde    | 0.85959675  | 3828927.333 | 3939669.333 | 0.971890534 |
| Indole-3-lactic acid     | 0.630136872 | 285528.5667 | 319692.0667 | 0.893136228 |
| Indole-3-pyruvic acid    | 0.471438278 | 648822.5333 | 729294.1333 | 0.889658238 |
| inosine                  | 0.779765364 | 8575.801667 | 8257.379    | 1.038562196 |
| isoleucine               | 0.913797036 | 2118832.667 | 2190422.667 | 0.96731681  |
| ketoleucine              | 0.338346689 | 12794466.33 | 10765743    | 1.188442482 |
| lactate                  | 0.894485314 | 95766666.67 | 97533333.33 | 0.981886535 |
| Lactose                  | 0.635087856 | 38795.14667 | 48066.31333 | 0.807117167 |
| leucine                  | 0.678401101 | 3558637.667 | 3160474.333 | 1.125982144 |
| L-Fucose                 | 0.217517674 | 120768.9867 | 94696.79667 | 1.275322829 |
| L-Hydroxyproline         | 0.479432818 | 41673.70667 | 33353.75667 | 1.249445665 |
| Linoleic acid            | 0.636386847 | 795000000   | 908000000   | 0.875550661 |
| Lipoic acid              | 0.904327882 | 4682.505333 | 4399.671667 | 1.064285176 |
| Lithocholic acid         | 0.084426377 | 11378.968   | 34632.30667 | 0.32856512  |
| L-norvaline              | 0.786327141 | 3580856     | 3872203.333 | 0.924759289 |
| L-Rhamnose               | 0.217517674 | 120768.9867 | 94696.79667 | 1.275322829 |
| L-Threonic acid          | 0.818115179 | 68182.77    | 70569.49333 | 0.966179106 |
| lysine                   | 0.159783092 | 491048.2    | 367730.1667 | 1.335349244 |
| malate                   | 0.50852492  | 1002836.133 | 788178      | 1.272347279 |
| Malonic acid             | 0.060360305 | 341598.0333 | 231185.3333 | 1.477593879 |
| Mannose                  | 0.056844197 | 18400000    | 14133333.33 | 1.301886792 |
| methionine               | 0.844469233 | 507995.7667 | 489433.1333 | 1.037926802 |
| Methionine sulfoxide     | 0.11532719  | 19143.76    | 9667.057667 | 1.980308865 |
| Methylmalonic acid       | 0.136365337 | 2160257     | 2796359.667 | 0.772524731 |
| myo-inositol             | 0.925558775 | 138601.67   | 135478.9333 | 1.023049611 |
| Myristic acid            | 0.062232408 | 4856186     | 11198004.67 | 0.433665295 |
| N2-methylguanosine       | 0.461952546 | 37351.47333 | 31453.81667 | 1.1875021   |
| N-Acetylaspartic acid    | 0.914655923 | 76655       | 74757.13667 | 1.025387052 |
| N-acetyl-glutamate       | 0.472943019 | 24594.45    | 17734.659   | 1.386801404 |

|                          |             |             |             |             |
|--------------------------|-------------|-------------|-------------|-------------|
| N-acetyl-glutamine       | 0.938531688 | 29213.78    | 29787.95333 | 0.980724646 |
| N-Acetyl glycine         | 0.47077446  | 169962.4667 | 198826      | 0.854830187 |
| N-Acetyl-L-alanine       | 0.479432818 | 41673.70667 | 33353.75667 | 1.249445665 |
| N-Acetyl-L-asparagine    | 0.181658876 | 25518.48667 | 38112.56333 | 0.669555769 |
| N-Acetyl-L-isoleucine    | 0.769327195 | 148012.4    | 173688.97   | 0.852169254 |
| N-Acetyl-L-methionine    | 0.113944766 | 18431.95667 | 29341.53333 | 0.628186552 |
| N-acetyl-L-ornithine     | 0.728338718 | 43665.57333 | 39526.44667 | 1.104717904 |
| N-acetyl-L-phenylalanine | 0.457505228 | 142966.3733 | 242993.9033 | 0.588353746 |
| N-Acetyl-L-serine        | 0.262555916 | 12783.52333 | 10697.694   | 1.194979342 |
| N-Acetylneuraminic acid  | 0.525984098 | 10911.179   | 8750.692667 | 1.246893179 |
| NADPH                    | 0.523743589 | 9452.285    | 10049.77833 | 0.940546616 |
| N-Butyrylglycine         | 0.041842886 | 49950.92    | 114445.57   | 0.436460057 |
| N-Iso valerylglycine     | 0.110940888 | 80996.01667 | 161858.8967 | 0.500411274 |
| N-Methyl-D-aspartic acid | 0.080675362 | 884047.5333 | 664032.9    | 1.331330923 |
| N-Tiglylglycine          | 0.286742539 | 11184.86933 | 17324.86367 | 0.645596384 |
| O-acetyl-L-serine        | 0.262555916 | 12783.52333 | 10697.694   | 1.194979342 |
| O-Phosphorylethanolamine | 0.922545811 | 10007.57267 | 9593.687667 | 1.043141388 |
| ornithine                | 0.929125606 | 81580.02    | 83297.77    | 0.979378199 |
| orotate                  | 0.582174709 | 103601.4267 | 90699.70667 | 1.142246546 |
| pantothenate             | 0.9950706   | 113007.8767 | 113461.1533 | 0.996005006 |
| p-Cresol                 | 0.524448704 | 15782.07667 | 20952.71667 | 0.753223409 |
| phenylacetyl glutamine   | 0.166096859 | 220.9480333 | 621.2423667 | 0.355655128 |
| phenylalanine            | 0.539643573 | 1370334     | 1223771.933 | 1.119762566 |
| Phenyllactic acid        | 0.886413135 | 178845.3    | 169618.7333 | 1.054395918 |
| Pipecolic acid           | 0.819185921 | 36951.41667 | 35456.25333 | 1.042169242 |
| proline                  | 0.28483519  | 1304366.2   | 937143.6    | 1.391853074 |
| pseudouridine            | 0.707293376 | 303451.5    | 217364.8067 | 1.396047063 |
| Pyroglutamic acid        | 0.284040036 | 1004689.067 | 773418.5    | 1.299023836 |
| pyruvate                 | 0.450697671 | 50466666.67 | 42333333.33 | 1.192125984 |
| Quinic acid              | 0.274749356 | 1598.740667 | 2771.712    | 0.5768062   |
| Ribose                   | 0.360174307 | 786569.7    | 661339.6    | 1.189358236 |
| ribose-5-phosphate       | 0.365966648 | 4396.079667 | 1198.093133 | 3.669230333 |
| Ribothymidine            | 0.168883131 | 3801.873    | 5804.224667 | 0.655018236 |
| sarcosine                | 0.846973694 | 2710219     | 2808744.333 | 0.964921929 |
| Sebacic acid             | 0.746233844 | 106511.4233 | 126705.15   | 0.840624263 |
| serine                   | 0.755222403 | 401201.9667 | 430882.3    | 0.931117307 |
| sn-glycerol-3-phosphate  | 0.083697108 | 95575.27333 | 196425.5667 | 0.486572471 |
| sorbitol                 | 0.517110138 | 8805.715    | 10176.45967 | 0.865302403 |
| Stearic acid             | 0.250550268 | 34000000    | 40000000    | 0.85        |
| succinate                | 0.136365337 | 2160257     | 2796359.667 | 0.772524731 |
| sucrose                  | 0.13694396  | 60933.85    | 38629.01667 | 1.577411367 |
| taurine                  | 0.031280058 | 10456824.33 | 1310000     | 0.798230865 |
| Taurodeoxycholic acid    | 0.346641602 | 974921      | 1341162.467 | 0.726922371 |
| threonine                | 0.961812223 | 563579.7    | 571357.8    | 0.986386639 |
| thymine                  | 0.120554844 | 469254      | 258944.3    | 1.81218123  |
| trans-urocanic acid      | 0.47276197  | 44709.06333 | 20661.74333 | 2.163857261 |
| Tricarballic acid        | 0.743496677 | 46855.25    | 38586.32333 | 1.214296827 |
| tropic acid              | 0.418019307 | 4346.541    | 11440.224   | 0.379934956 |
| tryptophan               | 0.931951122 | 788673.3    | 770962.5667 | 1.022972235 |
| tyrosine                 | 0.638203135 | 137960.7667 | 125489.9    | 1.099377453 |
| Undecanoic acid          | 0.860209154 | 30464.59333 | 29169.55333 | 1.044396977 |
| uridine                  | 0.707293376 | 303451.5    | 217364.8067 | 1.396047063 |
| valine                   | 0.786327141 | 3580856     | 3872203.333 | 0.924759289 |

**Sirt3 WT, KO mice\_brain-NTS****metabolites**

|                                         | <b>NTS_WT 1</b> | <b>NTS_WT 2</b> | <b>NTS_WT 3</b> | <b>NTS_KO 1</b> | <b>NTS_KO 2</b> | <b>NTS_KO 3</b> |
|-----------------------------------------|-----------------|-----------------|-----------------|-----------------|-----------------|-----------------|
| (R)-(+)-2-Pyrrolidone-5-carboxylic acid | 5192025         | 4651381         | 4492710         | 1460533         | 3637428         | 1657892         |
| 2-Deoxy-D-ribose                        | 6951.756        | 3084.213        | 2471.728        | 3002.076        | 3658.184        | 2679.178        |
| 2-hydroxybutyrate                       | 560596.2        | 494897.9        | 275179.5        | 167963.1        | 397638.1        | 184134.3        |
| 2-Hydroxycaproic acid                   | 426267          | 80458.31        | 22648.18        | 107756.2        | 95273.31        | 176290.7        |
| 2-hydroxyglutarate                      | 863284.8        | 976209.8        | 1062171         | 254010.6        | 542945.2        | 370917.5        |
| 2-Hydroxyhexanedioic Acid               | 96648.38        | 75744.9         | 120508          | 38678.53        | 44176.77        | 280014.4        |
| 2-Hydroxyoctanoic acid                  | 26583.51        | 27554.15        | 36486.93        | 33875.72        | 65328.68        | 74417.96        |
| 2-Hydroxyvaleric acid                   | 66056.1         | 56700.33        | 60261.97        | 24557.44        | 29841.91        | 59561.14        |
| 2-Isopropylmalic acid                   | 7085.301        | 5959.541        | 4071.635        | 5336.272        | 3083.374        | 2567.409        |
| 2-Ketobutyric acid                      | 65530.67        | 31388.38        | 40844.3         | 66837.7         | 28537.17        | 73324.85        |
| 2-Methylglutaric acid                   | 94385.63        | 54509.46        | 17343.07        | 56330.06        | 51529.59        | 30657.4         |
| 2-Methylsuccinic acid                   | 107216.3        | 72247.79        | 18588.1         | 73630.4         | 83848.71        | 45463           |
| 2-Oxo-3-phenylpropanoic acid            | 2037297         | 196489          | 793355.8        | 1311428         | 1222348         | 1280240         |
| 2-Oxoadipic acid                        | 7090.926        | 7725.24         | 12986.88        | 7209.176        | 5654.283        | 8791.937        |
| 2-Phenylbutyric acid                    | 6564.322        | 4374.373        | 9569.006        | 20554.29        | 10223.02        | 8417.048        |
| 2-Phenylpropionic acid                  | 39417.4         | 33820.21        | 27458.93        | 36261.4         | 43877.06        | 15476.34        |
| 3-4-Dihydroxyhydrocinnamic acid         | 41297.71        | 52418.89        | 96757.25        | 22848.49        | 80908.48        | 22128           |
| 3-5-Dihydroxybenzoic acid               | 14610.45        | 17722.41        | 5610.25         | 11771.86        | 17080.13        | 5200            |
| 3-Cresotinic acid                       | 27559.64        | 20429.61        | 20660.87        | 22089.05        | 26531.35        | 56659.5         |
| 3-hydroxybutyrate                       | 166487.5        | 151113          | 152851.8        | 49598.96        | 210551.2        | 61161.31        |
| 3-Hydroxycinnamic acid                  | 2037297         | 196489          | 793355.8        | 1311428         | 1222348         | 1280240         |
| 3-Hydroxyisovaleric acid                | 453508.4        | 370160.8        | 52544.97        | 139639.6        | 299568          | 74365.45        |
| 3-Hydroxypropionic Acid                 | 5.80E+07        | 6.05E+07        | 6.90E+07        | 2.87E+07        | 5.42E+07        | 3.42E+07        |
| 3-Methyladipic acid                     | 55974.46        | 34720.64        | 11042.83        | 36263.48        | 37275.71        | 17847.29        |
| 3-Methylglutaric acid                   | 94385.63        | 54509.46        | 17343.07        | 56330.06        | 51529.59        | 30657.4         |
| 3-phosphoglycerate                      | 113377.7        | 0               | 137751.4        | 10362.88        | 43848.27        | 26299.54        |
| 4-hydroxy-3-methylbenzoic acid          | 27559.64        | 16129.65        | 20660.87        | 22089.05        | 26531.35        | 56659.5         |
| 4-Methylvaleric acid                    | 989543.7        | 351595          | 280396.6        | 582585.9        | 474867          | 661340.2        |
| 5'-Methylthioadenosine                  | 47896.73        | 53665.18        | 78643.84        | 15764.78        | 35176.14        | 51183.56        |
| 5-Phenylvaleric acid                    | 66005.84        | 37354.71        | 13693.8         | 49253.19        | 58811.52        | 20365.61        |
| 6-Dimethylaminopurine                   | 106545.4        | 153821.5        | 142196.8        | 146272.5        | 229655.1        | 208110.5        |
| 6-phospho-D-gluconate                   | 16320.81        | 13193.78        | 24810.11        | 1403.307        | 9467.985        | 6916.285        |
| acetoacetate                            | 529643.8        | 611484          | 727535.2        | 366209.9        | 594515.3        | 443149.5        |
| acetyl-CoA                              | 5060.389        | 1158.286        | 0               | 0               | 0               | 0               |
| acetylphosphate                         | 30256.99        | 26111.74        | 39829.15        | 12883.17        | 34118.59        | 21143.36        |
| aconitate                               | 236385.2        | 176843.9        | 512441.5        | 167547.7        | 218977.1        | 67603.45        |
| adenine                                 | 265677.1        | 143519.6        | 381219.5        | 246423.7        | 145588.2        | 157106.6        |
| adenosine                               | 509554.1        | 305767.3        | 864745.1        | 598030          | 293587.4        | 376942.3        |
| Adipic acid                             | 94385.63        | 54509.46        | 17343.07        | 56330.06        | 51529.59        | 30657.4         |
| Adonitol                                | 17830.02        | 19159.93        | 17458.45        | 6028.35         | 9222.37         | 6818.117        |
| ADP                                     | 117022.6        | 116664.5        | 136093          | 39830.9         | 112995.3        | 49494.37        |
| ADP-D-glucose                           | 63475.01        | 56210.2         | 129890.8        | 34404.3         | 73040.05        | 35544.54        |
| a-ketoglutarate                         | 219858.7        | 263062.5        | 346318.1        | 111328          | 260188.1        | 162795.3        |
| Ala-Ala                                 | 5157.047        | 7311.552        | 4953.214        | 3218.639        | 5033.119        | 3409.346        |
| alanine                                 | 1.45E+07        | 1.30E+07        | 1.54E+07        | 5564356         | 9000982         | 6975698         |
| allantoin                               | 24950.94        | 26686.83        | 30245.06        | 59685.44        | 17431.18        | 9333.738        |
| Aminoadipic acid                        | 28220.97        | 15131.66        | 25178.15        | 6812.752        | 18295.55        | 15997.67        |
| Aminolevulinic acid                     | 733188.9        | 871587.2        | 1188072         | 337804.9        | 774907.2        | 401018.9        |
| Aminomalonic acid                       | 4169.417        | 1118.131        | 4845.979        | 495.5428        | 631.4963        | 698.1761        |
| AMP                                     | 869597.7        | 536676.7        | 520640.7        | 339500.4        | 1545602         | 486911          |
| anserine                                | 232723.8        | 0               | 133479.3        | 0               | 0               | 0               |
| Arachidic acid                          | 5344788         | 4083343         | 889500.4        | 1177716         | 1001238         | 2007540         |
| arginine                                | 816144.8        | 698592.7        | 602158.8        | 145697.6        | 382880.1        | 256478.7        |

|                                     |          |          |          |          |          |          |
|-------------------------------------|----------|----------|----------|----------|----------|----------|
| asparagine                          | 257593.2 | 206616.2 | 265318.4 | 53806.08 | 158588.8 | 64271.57 |
| aspartate                           | 1.47E+07 | 1.54E+07 | 1.88E+07 | 4187123  | 7173958  | 8262646  |
| Aspartyl-L-phenylalanine            | 12654.94 | 7509.758 | 6868.745 | 3396.583 | 4755.295 | 3282.108 |
| ATP                                 | 22525.65 | 21294.34 | 36398.75 | 13213.29 | 14465.51 | 15333.88 |
| b-alanine                           | 1.45E+07 | 1.30E+07 | 1.54E+07 | 5564356  | 9000982  | 6975698  |
| betaine                             | 843323.4 | 722865.2 | 648339.2 | 331534.9 | 509068.6 | 309444   |
| biotin                              | 981.8032 | 839.6287 | 835.2602 | 0        | 0        | 0        |
| carnosine                           | 1.06E+07 | 8562884  | 5327568  | 1953043  | 3202388  | 1994596  |
| CDP                                 | 1926.537 | 0        | 3209.342 | 682.4227 | 976.5436 | 901.0068 |
| cellobiose                          | 416806.8 | 259922   | 185735.6 | 514704.5 | 232041.4 | 470374   |
| cis-uropic acid                     | 69761.95 | 73583.61 | 10432.69 | 110679.8 | 55788.02 | 19973.26 |
| Citramalic acid                     | 863284.8 | 976209.8 | 1062171  | 254010.6 | 542945.2 | 370917.5 |
| citrate                             | 892959.8 | 736989.7 | 2872572  | 238578.5 | 526008.8 | 184054.2 |
| citrulline                          | 20531.95 | 21161.19 | 10271.79 | 13288.12 | 13896.64 | 8409.188 |
| CMP                                 | 104138.3 | 81288.74 | 104383.6 | 28750.66 | 73054.63 | 37722.64 |
| coenzyme A                          | 1921.529 | 4470.116 | 4393.892 | 0        | 7684.283 | 3415.918 |
| creatine                            | 7819346  | 7225918  | 8695871  | 3325781  | 5187394  | 4038711  |
| Creatinine                          | 101699.6 | 112410.1 | 149561.2 | 48163.84 | 71585.02 | 48579.68 |
| Cyclic-ADP-ribose                   | 14657.22 | 9993.126 | 13853.2  | 1249.328 | 5297.634 | 4502.507 |
| cyclic-AMP                          | 13351.73 | 13052.19 | 10903.12 | 6559.215 | 6036.305 | 3445.681 |
| cystathionine                       | 105372.2 | 77619.03 | 94356.99 | 6642.335 | 65329.19 | 15078.18 |
| Cysteine-glutathione disulphide     | 913389.3 | 966557.5 | 1978411  | 186552.9 | 582225.2 | 266158.8 |
| Cystine                             | 198662.3 | 212824.6 | 316782   | 32458.33 | 108118.5 | 56104.33 |
| cytidine                            | 16367.11 | 14423.24 | 14760    | 10258.78 | 12160.05 | 9820.618 |
| D-Arabitol                          | 17830.02 | 19159.93 | 17458.45 | 6028.35  | 9222.37  | 6818.117 |
| dCMP                                | 8041.891 | 4988.074 | 4923.339 | 1227.745 | 0        | 0        |
| Dehydroascorbic acid                | 31825.08 | 21607.67 | 38126.98 | 10131.31 | 13869.8  | 10494.44 |
| deoxyinosine                        | 7133.715 | 9812.35  | 8303.46  | 3092.333 | 4090.436 | 3301.439 |
| deoxyuridine                        | 18324.31 | 10018.49 | 13912.59 | 16055.27 | 7546.701 | 26881.78 |
| dephospho-CoA                       | 84919.94 | 73183.12 | 88224.16 | 9941.071 | 30898.26 | 14608.91 |
| D-erythrose-4-phosphate             | 4142.453 | 3148.325 | 4649.168 | 2171.437 | 7208.769 | 1074.498 |
| D-Fructose                          | 9560.477 | 5511.554 | 4834.131 | 5547.563 | 5211.443 | 2864.485 |
| dGDP                                | 117022.6 | 116664.5 | 136093   | 39830.9  | 112995.3 | 49494.37 |
| D-glucono-delta-lactone-6-phosphate | 23029.11 | 20005.54 | 22225.31 | 8462.398 | 16099.64 | 19431.66 |
| D-glucosamine-6-phosphate           | 30120.35 | 31093.48 | 29849.81 | 16915.84 | 23337.91 | 20591.62 |
| D-glyceraldehyde-3-phosphate        | 291277.3 | 249640.6 | 267037.7 | 41908.62 | 125355.3 | 54500.7  |
| dGMP                                | 869597.7 | 536676.7 | 520640.7 | 339500.4 | 1545602  | 486911   |
| dihydroxy-acetone-phosphate         | 291277.3 | 249640.6 | 267037.7 | 41908.62 | 125355.3 | 54500.7  |
| DL-Arabinose                        | 18430.34 | 3843.681 | 2304.96  | 4664.085 | 4423.398 | 2065.605 |
| D-mannose 6-phosphate               | 1.02E+07 | 9124712  | 7093886  | 2585741  | 6308642  | 3891625  |
| D-sedoheptulose-7/1-phosphate       | 798549.5 | 602614.9 | 904197.6 | 130080.2 | 433545.2 | 201733.9 |
| dTDP                                | 43137.6  | 57396.25 | 65237.04 | 0        | 23148.9  | 4790.417 |
| dUMP                                | 10211.25 | 17340.65 | 20117.97 | 13030.67 | 18272.67 | 15069.56 |
| D-Xylose                            | 49734.75 | 7613.418 | 1673.02  | 11612.66 | 7571.744 | 4957.343 |
| elcosapentaenoic acid               | 4671028  | 5477654  | 3076870  | 2277733  | 1394650  | 1215964  |
| FAD                                 | 252958.2 | 178037.8 | 162818   | 60433.5  | 105207.1 | 67040.05 |
| FMN                                 | 17066.09 | 11667.65 | 9515.597 | 3317.094 | 5812.265 | 965.8057 |
| fructose-1-6-bisphosphate           | 241691.4 | 277939.9 | 364863.6 | 17265.55 | 95192.16 | 52495.08 |
| fructose-6-phosphate                | 1.02E+07 | 9124712  | 7093886  | 2585741  | 6308642  | 3891625  |
| fumarate                            | 1470732  | 1681434  | 2139951  | 629452.6 | 1297203  | 997056.5 |
| Galacturonic acid                   | 9246.528 | 7142.484 | 9003.136 | 3399.01  | 4117.186 | 6302.782 |
| GDP                                 | 54318.11 | 46912.44 | 73802.74 | 16721.36 | 29421.29 | 21121.32 |
| glucose-1-phosphate                 | 1.02E+07 | 9124712  | 7093886  | 2585741  | 6308642  | 3891625  |
| glucose-6-phosphate                 | 1.02E+07 | 9124712  | 7093886  | 2585741  | 6308642  | 3891625  |
| Glutaconic acid                     | 77452.19 | 87591.69 | 243590.5 | 74017.88 | 62297.42 | 80855.35 |

|                          |          |          |          |          |          |          |
|--------------------------|----------|----------|----------|----------|----------|----------|
| glutamate                | 2.08E+07 | 2.12E+07 | 2.50E+07 | 7695864  | 1.56E+07 | 9861363  |
| glutamine                | 1.15E+07 | 1.10E+07 | 1.31E+07 | 3826408  | 1.90E+07 | 5196328  |
| Glutaric acid            | 107216.3 | 72247.79 | 18588.1  | 73630.4  | 83848.71 | 45463    |
| glutathione              | 169584.9 | 97778.57 | 137612   | 22171.14 | 45067.44 | 40279.54 |
| glutathione disulfide    | 561672.1 | 440231.8 | 946110.7 | 259275.6 | 534584.4 | 266755.9 |
| glycerate                | 63241.41 | 33755.34 | 32438.36 | 11484.38 | 18798.82 | 9660.413 |
| Glycerophosphocholine    | 73050.16 | 51558.58 | 129527.9 | 89421.5  | 49325.42 | 74298.18 |
| glycine                  | 2674488  | 2397150  | 1808368  | 571423.6 | 1469984  | 758643.1 |
| glycolate                | 586335.2 | 409545.4 | 253682.9 | 298294.4 | 360596   | 274710   |
| Glycyl-L-leucine         | 6291.868 | 5511.262 | 4817.544 | 1652.791 | 3968.78  | 1906.864 |
| Glycyl-L-tyrosine        | 48520.04 | 43828.64 | 31191.61 | 10151.95 | 20576.77 | 13065.72 |
| glyoxylate               | 124120.5 | 105947.6 | 110510   | 55755.23 | 84358.32 | 67886.91 |
| GMP                      | 1390803  | 1115681  | 1499839  | 522433.4 | 1158897  | 560670.4 |
| GTP                      | 781.1929 | 1400.672 | 2061.514 | 0        | 1050.75  | 838.6186 |
| Guaiacol                 | 20871.44 | 18330.04 | 3178.78  | 8247.099 | 10223.09 | 6531.907 |
| Guanidoacetic acid       | 6531.174 | 5774.553 | 3210.872 | 2249.753 | 4768.223 | 2547.975 |
| guanosine                | 2700798  | 2922465  | 4025221  | 1080145  | 1788210  | 1363354  |
| Homocarnosine            | 2.06E+07 | 1.84E+07 | 1.27E+07 | 3738113  | 5165538  | 4470774  |
| homoserine               | 304782.8 | 211151.1 | 217223.5 | 48599.54 | 57585.08 | 54430.97 |
| Hydroxyindoleacetic acid | 5081.931 | 5279.891 | 12001.62 | 4455.296 | 1392.916 | 2374.664 |
| hydroxyproline           | 733188.9 | 871587.2 | 1188072  | 337804.9 | 774907.2 | 401018.9 |
| Hypotaaurine             | 0        | 0        | 927.4522 | 0        | 0        | 0        |
| hypoxanthine             | 9410096  | 1.02E+07 | 9994173  | 3267022  | 6543024  | 4779542  |
| IDP                      | 27468.71 | 22089.99 | 17696.26 | 3735.023 | 12847.25 | 9941.536 |
| Imidazoleacetic acid     | 16283.36 | 9958.774 | 18781.06 | 5379.99  | 16320.62 | 13339.56 |
| IMP                      | 206920.2 | 85673.9  | 100884.5 | 83821.56 | 187882.7 | 84633.91 |
| Indole-2-carboxylic acid | 2292.707 | 8675.776 | 8390.458 | 4916.584 | 1220.269 | 817.4373 |
| Indole-3-acetaldehyde    | 58710.04 | 23867.5  | 43266.45 | 77340.95 | 41768.25 | 62508.06 |
| Indole-3-lactic acid     | 6911.647 | 0        | 0        | 7696.016 | 0        | 0        |
| inosine                  | 5.37E+07 | 6.49E+07 | 7.26E+07 | 1.89E+07 | 3.48E+07 | 2.57E+07 |
| isoleucine               | 648868.1 | 653585.8 | 513348.3 | 235811.9 | 380943.9 | 256615.2 |
| ketoleucine              | 150700.6 | 354320.2 | 213919.8 | 302661.1 | 339762.6 | 362341   |
| lactate                  | 5.80E+07 | 6.05E+07 | 6.90E+07 | 2.87E+07 | 5.42E+07 | 3.42E+07 |
| Lactose                  | 416806.8 | 259922   | 185735.6 | 514704.5 | 232041.4 | 470374   |
| L-Cysteic acid           | 4041.406 | 3274.527 | 1061.974 | 2302.191 | 2894.268 | 1154.911 |
| leucine                  | 3086522  | 2882091  | 2203377  | 1001587  | 1553482  | 1174671  |
| L-Fucose                 | 32962.03 | 14273.98 | 8573.386 | 3540.993 | 5973.101 | 4662.836 |
| L-Hydroxyproline         | 818869   | 967013.9 | 576610.7 | 115974.9 | 323201.4 | 250253.4 |
| Linoleic acid            | 3.22E+07 | 3.17E+07 | 3.07E+07 | 1.77E+07 | 1.95E+07 | 1.48E+07 |
| Lipoic acid              | 153305.5 | 142306.9 | 273912.3 | 6639.062 | 89559.88 | 10430.31 |
| L-Rhamnose               | 17208    | 11870.48 | 3206.46  | 7696.268 | 3867.143 | 5454.15  |
| L-Threonic acid          | 716832   | 600414.4 | 891250.5 | 155797.4 | 280283.3 | 186009.2 |
| lysine                   | 207213.8 | 148018.8 | 137298.2 | 30928.79 | 68981.4  | 41743.94 |
| malate                   | 7641588  | 8290738  | 9815885  | 3322594  | 6111720  | 5116242  |
| Malonic acid             | 1601315  | 806948.4 | 227135.3 | 791078.5 | 735713.8 | 583966.8 |
| Mandelic acid            | 20100.72 | 9054.121 | 9374.759 | 13522.45 | 26531.35 | 15813.04 |
| mannitol 1-phosphate     | 11478.84 | 7109.611 | 13086.91 | 0        | 5768.422 | 2062.681 |
| Mannose                  | 44179.83 | 23112.99 | 15536.59 | 19408.69 | 24520.52 | 14598.89 |
| methionine               | 332478.2 | 338374.9 | 275366.7 | 65335.65 | 162617.2 | 84608.87 |
| Methionine sulfoxide     | 7584.568 | 6404.715 | 3094.221 | 2275.008 | 5372.092 | 3875.155 |
| Methylmalonic acid       | 1824203  | 1736128  | 1715617  | 1270285  | 1852988  | 1042620  |
| Mucic acid               | 13066.01 | 9479.595 | 11869.92 | 2876.885 | 3160.769 | 6106.447 |
| Muramic acid             | 28059.04 | 21165.69 | 40120.41 | 3270.211 | 5218.352 | 6190.748 |
| myo-inositol             | 6684678  | 5748978  | 8231174  | 2406009  | 2183538  | 2798354  |
| Myristic acid            | 5.71E+07 | 4.00E+07 | 2.66E+07 | 3.15E+07 | 2.91E+07 | 2.57E+07 |

|                           |          |          |          |          |          |          |
|---------------------------|----------|----------|----------|----------|----------|----------|
| N-Acetylaspartic acid     | 4.42E+07 | 5.66E+07 | 7.74E+07 | 2.23E+07 | 4.26E+07 | 2.89E+07 |
| N-acetylcysteine          | 10761.42 | 2242.923 | 9094.438 | 1742.101 | 3546.717 | 2518.544 |
| N-acetyl-glutamate        | 232767.5 | 259707.9 | 345541.4 | 54308.28 | 138401.8 | 79800.85 |
| N-acetyl-glutamine        | 9643.147 | 9590.97  | 7066.097 | 4224.237 | 23318.87 | 6455.579 |
| N-Acetylglycine           | 17962.15 | 16355.88 | 14961.82 | 12971.12 | 13821.85 | 13375.51 |
| N-Acetyl-L-alanine        | 818869   | 967013.9 | 576610.7 | 115974.9 | 323201.4 | 250253.4 |
| N-Acetyl-L-arginine       | 4082.51  | 1940.466 | 3611.232 | 2558.969 | 3526.284 | 1836.416 |
| N-Acetyl-L-asparagine     | 11818.49 | 11387.25 | 13556.36 | 7847.738 | 13818.92 | 9482.642 |
| N-Acetyl-L-methionine     | 60870.41 | 84492.25 | 92537.91 | 25752.14 | 45526.97 | 42451    |
| N-acetyl-L-ornithine      | 1756.733 | 3279.113 | 1484.723 | 1579.333 | 3691.383 | 0        |
| N-Acetyl-L-proline        | 16905.19 | 11124.22 | 5091.355 | 5792.741 | 8669.745 | 7316.088 |
| N-Acetylneuraminic acid   | 335957.2 | 333118.1 | 505399.8 | 94576.44 | 141300.7 | 108765   |
| N-Acetyltyrosine          | 2359.227 | 742.7883 | 873.3111 | 1503.837 | 2099.076 | 1503.164 |
| NAD+                      | 15591.1  | 8334.673 | 9115.294 | 1643.165 | 7541.288 | 3396.813 |
| NADH                      | 0        | 0        | 0        | 3331.996 | 0        | 0        |
| NADP+                     | 3555.972 | 1977.729 | 6013.255 | 1063.583 | 3094.619 | 0        |
| N-Formyl-L-methionine     | 10648.27 | 12825.69 | 11978.6  | 5160.677 | 8392.745 | 4674.651 |
| nicotinamide              | 472275.7 | 681619.2 | 932890.1 | 304505.9 | 424124.9 | 428341.1 |
| N-Methyl-D-aspartic acid  | 2.08E+07 | 2.12E+07 | 2.50E+07 | 7695864  | 1.56E+07 | 9861363  |
| O-acetyl-L-serine         | 107580.5 | 68850.28 | 52385.98 | 48585.01 | 37398.53 | 28126.32 |
| O-Phosphorylethanolamine  | 1676943  | 1330974  | 2495314  | 596393.9 | 969836.3 | 692224.8 |
| orotate                   | 13207.88 | 9305.487 | 9241.382 | 7976.994 | 11041.47 | 40496.28 |
| pantothenate              | 987115.5 | 975064.8 | 1021125  | 408324   | 758701.1 | 466173.6 |
| phenylalanine             | 861419   | 935582   | 666932.5 | 284016.5 | 700211.6 | 350243.9 |
| Phenylglyoxylic acid      | 67854.88 | 28622.57 | 10615.04 | 25968.59 | 41470.57 | 45854.77 |
| Phenyllactic acid         | 15550.02 | 14676.26 | 34190.93 | 15225.04 | 42115.46 | 25600.15 |
| phosphocreatine           | 0        | 585.2447 | 0        | 0        | 0        | 0        |
| phosphoenolpyruvate       | 0        | 0        | 45414.47 | 8153.787 | 0        | 0        |
| Phosphorylcholine         | 6076.669 | 5169.834 | 5316.306 | 2707.296 | 4262.842 | 1800.911 |
| Pimelic acid              | 55974.46 | 34720.64 | 11042.83 | 36263.48 | 37275.71 | 17847.29 |
| Pipecolic acid            | 4249.747 | 4856.998 | 5326.937 | 2117.746 | 1472.04  | 1067.652 |
| proline                   | 794736.8 | 720575.4 | 547160.4 | 207524.2 | 364450.8 | 230228.5 |
| pyridoxamine-5-phosphate  | 40844.86 | 35008.97 | 40535.52 | 7107.784 | 11964.71 | 7537.942 |
| Pyroglutamic acid         | 5192025  | 4651381  | 4492710  | 1460533  | 3637428  | 1657892  |
| pyruvate                  | 532061.5 | 593835.5 | 947207.4 | 422154.5 | 430330.6 | 448061.2 |
| Retinoic Acid             | 2514503  | 2682668  | 332425.5 | 0        | 182513.4 | 116622.7 |
| riboflavin                | 21108.59 | 21147.24 | 11184.25 | 4429.259 | 6565.432 | 4533.23  |
| ribose-5-phosphate        | 1200450  | 1000844  | 1158688  | 0        | 646700.2 | 384414.4 |
| Ribothymidine             | 32341.32 | 34578.05 | 37936.48 | 18088    | 19117.08 | 18430.92 |
| Saccharic acid            | 13066.01 | 9479.595 | 11869.92 | 2876.885 | 3160.769 | 6106.447 |
| S-adenosyl-L-homocysteine | 128386.6 | 149298.9 | 157143.4 | 34268.17 | 65984.19 | 33707.89 |
| sarcosine                 | 1.45E+07 | 1.30E+07 | 1.54E+07 | 5564356  | 9000982  | 6975698  |
| Sebacic acid              | 43057.04 | 32481.53 | 17140.97 | 33232.64 | 35480.1  | 24218.35 |
| serine                    | 1131290  | 1125172  | 955245.2 | 314638.4 | 646951.8 | 432006.8 |
| shikimate                 | 25800.5  | 13695.85 | 3152.974 | 14912.98 | 12980.03 | 9140.99  |
| sn-glycerol-3-phosphate   | 44950.14 | 32318.17 | 58773.86 | 30815.1  | 40147.83 | 22098.22 |
| Stearic acid              | 2.89E+08 | 1.69E+08 | 7.88E+07 | 9.79E+07 | 7.69E+07 | 8.88E+07 |
| Suberic acid              | 43464.07 | 10004.17 | 1506.565 | 31786.64 | 20179.32 | 21706.57 |
| succinate                 | 1824203  | 1736128  | 1715617  | 1270285  | 1852988  | 1042620  |
| sucrose                   | 416806.8 | 259922   | 185735.6 | 514704.5 | 232041.4 | 470374   |
| taurine                   | 1.47E+07 | 1.65E+07 | 1.86E+07 | 7644566  | 1.11E+07 | 9175684  |
| thiamine-phosphate        | 1373.016 | 1707.417 | 2557.33  | 797.5627 | 881.4396 | 0        |
| threonine                 | 304782.8 | 211151.1 | 217223.5 | 48599.54 | 57585.08 | 54430.97 |
| thymidine                 | 0        | 7074.897 | 32335.38 | 8022.78  | 26943.85 | 8157.127 |
| trehalose-6-Phosphate     | 31450.14 | 20492.03 | 58177.57 | 3861.048 | 11196.61 | 8093.035 |

|                          |          |          |          |          |          |          |
|--------------------------|----------|----------|----------|----------|----------|----------|
| Tricarballic acid        | 250917.8 | 97291.05 | 29422.77 | 67504.3  | 49600.52 | 51974.67 |
| tryptophan               | 242184.7 | 190336.7 | 119713.9 | 27321.96 | 88075.8  | 31554.13 |
| tyrosine                 | 292315.3 | 177787.6 | 162752.2 | 28720.54 | 87710.77 | 25251.86 |
| UDP                      | 2194.193 | 1645.846 | 2378.248 | 3794.231 | 4551.338 | 3756.873 |
| UDP-D-glucose            | 920789.7 | 746184.8 | 1217289  | 327383.1 | 453764.5 | 313010.1 |
| UDP-D-glucuronate        | 26059.73 | 21307.25 | 62417.88 | 25206.78 | 42875.33 | 23792.18 |
| UDP-N-acetyl-glucosamine | 1608212  | 1289009  | 1855700  | 576885.5 | 1383445  | 627871.3 |
| UMP                      | 61423.48 | 40098.62 | 48357.4  | 21055.45 | 90724.34 | 29249.87 |
| Undecanoic acid          | 630839.2 | 361857.1 | 131463.7 | 373876.5 | 338004.5 | 199391.9 |
| uridine                  | 7616568  | 9395499  | 7060650  | 2444507  | 4150512  | 3048118  |
| valine                   | 843323.4 | 722865.2 | 648339.2 | 331534.9 | 509068.6 | 309444   |
| xanthine                 | 3213161  | 3162150  | 3012952  | 963470.2 | 1533586  | 1136601  |
| xanthosine               | 25657.09 | 22781.39 | 15018.45 | 7020.595 | 9201.666 | 5980.865 |
| xanthosine-5-phosphate   | 3032.51  | 4656.449 | 4331.081 | 687.2315 | 3287.069 | 2918.284 |

### Sirt3 WT, KO mice\_brain-NTS

A student's t test (unpaired) was used for statistical analysis.

| Metabolites                             | p-value  | mean_NTS_KO | mean_NTS_WT | Fold change |
|-----------------------------------------|----------|-------------|-------------|-------------|
| (R)-(+)-2-Pyrrolidone-5-carboxylic acid | 0.025409 | 2251951     | 4778705.333 | 0.471247094 |
| 2-Deoxy-D-ribose                        | 0.501668 | 3113.146    | 4169.232333 | 0.746695255 |
| 2-hydroxybutyrate                       | 0.16372  | 249911.8333 | 443557.8667 | 0.563425546 |
| 2-Hydroxycaproic acid                   | 0.716943 | 126440.07   | 176457.83   | 0.716545534 |
| 2-hydroxyglutarate                      | 0.004746 | 389291.1    | 967221.8667 | 0.402483767 |
| 2-Hydroxyhexanedioic Acid               | 0.786653 | 120956.5667 | 97633.76    | 1.238880554 |
| 2-Hydroxyoctanoic acid                  | 0.094561 | 57874.12    | 30208.19667 | 1.915841605 |
| 2-Hydroxyvaleric acid                   | 0.109724 | 37986.83    | 61006.13333 | 0.622672311 |
| 2-Isopropylmalic acid                   | 0.170115 | 3662.351667 | 5705.492333 | 0.641899323 |
| 2-Ketobutyric acid                      | 0.582957 | 56233.24    | 45921.11667 | 1.224561685 |
| 2-Methylglutaric acid                   | 0.715354 | 46172.35    | 55412.72    | 0.833244605 |
| 2-Methylsuccinic acid                   | 0.956701 | 67647.37    | 66017.39667 | 1.024690058 |
| 2-Oxo-3-phenylpropanoic acid            | 0.654231 | 1271338.667 | 1009047.267 | 1.259939657 |
| 2-Oxadipic acid                         | 0.37959  | 7218.465333 | 9267.682    | 0.778885738 |
| 2-Phenylbutyric acid                    | 0.200624 | 13064.786   | 6835.900333 | 1.911201943 |
| 2-Phenylpropionic acid                  | 0.862336 | 31871.6     | 33565.51333 | 0.949534115 |
| 3-4-Dihydroxyhydrocinnamic acid         | 0.45113  | 41961.65667 | 63491.28333 | 0.660904213 |
| 3-5-Dihydroxybenzoic acid               | 0.808103 | 11350.66333 | 12647.70333 | 0.897448575 |
| 3-Cresotinic acid                       | 0.333399 | 35093.3     | 22883.37333 | 1.533571973 |
| 3-hydroxybutyrate                       | 0.393679 | 107103.8233 | 156817.4333 | 0.682984162 |
| 3-hydroxybutyrate                       | 0.393679 | 107103.8233 | 156817.4333 | 0.682984162 |
| 3-Hydroxycinnamic acid                  | 0.654231 | 1271338.667 | 1009047.267 | 1.259939657 |
| 3-Hydroxyisovaleric acid                | 0.434402 | 171191.0167 | 292071.39   | 0.586127305 |
| 3-Hydroxypropionic Acid                 | 0.049508 | 39021036.67 | 62486486.67 | 0.624471606 |
| 3-Methyladipic acid                     | 0.822784 | 30462.16    | 33912.64333 | 0.898253778 |
| 3-Methylglutaric acid                   | 0.715354 | 46172.35    | 55412.72    | 0.833244605 |
| 3-Methylglutaric acid                   | 0.715354 | 46172.35    | 55412.72    | 0.833244605 |
| 3-phosphoglycerate                      | 0.261431 | 26836.89667 | 83709.7     | 0.320594826 |
| 4-hydroxy-3-methylbenzoic acid          | 0.295867 | 35093.3     | 21450.05333 | 1.636047214 |
| 4-Methylvaleric acid                    | 0.89555  | 572931.0333 | 540511.7667 | 1.059978836 |
| 5'-Methylthioadenosine                  | 0.134965 | 34041.49333 | 60068.58333 | 0.566710441 |
| 5-Phenylvaleric acid                    | 0.851806 | 42810.10667 | 39018.11667 | 1.097185367 |
| 6-Dimethylaminopurine                   | 0.103212 | 194679.3667 | 134187.9    | 1.450796731 |
| 6-phospho-D-gluconate                   | 0.044372 | 5929.192333 | 18108.23333 | 0.327430745 |
| acetoacetate                            | 0.154119 | 467958.2333 | 622887.6667 | 0.751272273 |
| acetyl-CoA                              | 0.247122 | 0           | 2072.891667 | 0           |
| acetylphosphate                         | 0.274745 | 22715.04    | 32065.96    | 0.708384842 |
| aconitate                               | 0.234984 | 151376.0833 | 308556.8667 | 0.490593792 |
| adenine                                 | 0.347691 | 183039.5    | 263472.0667 | 0.694720705 |
| adenosine                               | 0.503663 | 422853.2333 | 560022.1667 | 0.755065172 |
| Adipic acid                             | 0.715354 | 46172.35    | 55412.72    | 0.833244605 |
| Adonitol                                | 0.000585 | 7356.279    | 18149.46667 | 0.405316538 |
| ADP                                     | 0.079153 | 67440.19    | 123260.0333 | 0.547137528 |
| ADP-D-glucose                           | 0.25347  | 47662.96333 | 83192.00333 | 0.572927222 |
| a-ketoglutarate                         | 0.161318 | 178103.8    | 276413.1    | 0.644339215 |
| Ala-Ala                                 | 0.113053 | 3887.034667 | 5807.271    | 0.669339293 |
| alanine                                 | 0.00433  | 7180345.333 | 14314296.67 | 0.501620548 |
| allantoin                               | 0.927355 | 28816.786   | 27294.27667 | 1.055781267 |
| Amino adipic acid                       | 0.158815 | 13701.99067 | 22843.59333 | 0.599817659 |
| Aminolevulinic acid                     | 0.090127 | 504577      | 930949.3667 | 0.542002624 |

|                                            |          |             |             |             |
|--------------------------------------------|----------|-------------|-------------|-------------|
| Aminomalonic acid                          | 0.073391 | 608.4050667 | 3377.842333 | 0.180116479 |
| AMP                                        | 0.727267 | 790671.1333 | 642305.0333 | 1.230990094 |
| anserine                                   | 0.144469 | 0           | 122067.7    | 0           |
| Arachidic acid                             | 0.207778 | 1395498     | 3439210.467 | 0.405761152 |
| arginine                                   | 0.008593 | 261685.4667 | 705632.1    | 0.370852554 |
| asparagine                                 | 0.016607 | 92222.15    | 243175.9333 | 0.379240448 |
| aspartate                                  | 0.005164 | 6541242.333 | 16283826.67 | 0.401701791 |
| Aspartyl-L-phenylalanine                   | 0.051417 | 3811.328667 | 9011.147667 | 0.422957076 |
| ATP                                        | 0.063943 | 14337.56    | 26739.58    | 0.536192416 |
| b-alanine                                  | 0.00433  | 7180345.333 | 14314296.67 | 0.501620548 |
| betaine                                    | 0.013961 | 383349.1667 | 738175.9333 | 0.519319514 |
| biotin                                     | 5.14E-05 | 0           | 885.5640333 | 1.13E-05    |
| carnosine                                  | 0.022277 | 2383342.333 | 8175944     | 0.291506685 |
| CDP                                        | 0.411237 | 853.3243667 | 1711.959667 | 0.498448873 |
| cellobiose                                 | 0.347265 | 405706.6333 | 287488.1333 | 1.411211756 |
| cis-urocanic acid                          | 0.760589 | 62147.02667 | 51259.41667 | 1.212402144 |
| Citramalic acid                            | 0.004746 | 389291.1    | 967221.8667 | 0.402483767 |
| citrate                                    | 0.163716 | 316213.8333 | 1500840.5   | 0.210691165 |
| citrulline                                 | 0.237658 | 11864.64933 | 17321.64333 | 0.684960953 |
| CMP                                        | 0.032176 | 46509.31    | 96603.54667 | 0.48144516  |
| coenzyme A                                 | 0.966894 | 3700.067    | 3595.179    | 1.029174625 |
| creatine                                   | 0.005677 | 4183962     | 7913711.667 | 0.528697807 |
| Creatinine                                 | 0.01666  | 56109.51333 | 121223.6333 | 0.462859525 |
| Cyclic-ADP-ribose                          | 0.008527 | 3683.156333 | 12834.51533 | 0.286972763 |
| cyclic-AMP                                 | 0.004543 | 5347.067    | 12435.68    | 0.429977854 |
| cystathionine                              | 0.033892 | 29016.56833 | 92449.40667 | 0.3138643   |
| Cysteine-glutathione disulphide            | 0.062323 | 344978.9667 | 1286119.267 | 0.268232485 |
| Cystine                                    | 0.015097 | 65560.38667 | 242756.3    | 0.270066675 |
| cytidine                                   | 0.00902  | 10746.48267 | 15183.45    | 0.707776076 |
| D-Arabitol                                 | 0.000585 | 7356.279    | 18149.46667 | 0.405316538 |
| dCMP                                       | 0.007308 | 409.2483333 | 5984.434667 | 0.068385463 |
| Dehydroascorbic acid                       | 0.018517 | 11498.51667 | 30519.91    | 0.376754606 |
| deoxyinosine                               | 0.004103 | 3494.736    | 8416.508333 | 0.41522397  |
| deoxyuridine                               | 0.675656 | 16827.917   | 14085.13    | 1.194729264 |
| dephospho-CoA                              | 0.001242 | 18482.747   | 82109.07333 | 0.225099934 |
| D-erythrose-4-phosphate                    | 0.811102 | 3484.901333 | 3979.982    | 0.87560731  |
| D-Fructose                                 | 0.285419 | 4541.163667 | 6635.387333 | 0.684385619 |
| dGDP                                       | 0.079153 | 67440.19    | 123260.0333 | 0.547137528 |
| D-glucono- $\epsilon$ -lactone-6-phosphate | 0.103274 | 14664.566   | 21753.32    | 0.674130018 |
| D-glucosamine-6-phosphate                  | 0.006062 | 20281.79    | 30354.54667 | 0.668163166 |
| D-glyceraldehyde-3-phosphate               | 0.002414 | 73921.54    | 269318.5333 | 0.274476246 |
| dGMP                                       | 0.727267 | 790671.1333 | 642305.0333 | 1.230990094 |
| dihydroxy-acetone-phosphate                | 0.002414 | 73921.54    | 269318.5333 | 0.274476246 |
| DL-Arabinose                               | 0.438322 | 3717.696    | 8192.993667 | 0.453765272 |
| D-mannose 6-phosphate                      | 0.033012 | 4262002.667 | 8810896     | 0.483719552 |
| D-sedoheptulose-7/1-phosphate              | 0.015681 | 255119.7667 | 768454      | 0.331990941 |
| dTDP                                       | 0.008648 | 9313.105667 | 55256.96333 | 0.168541757 |
| dUMP                                       | 0.902723 | 15457.63333 | 15889.95667 | 0.972792668 |
| D-Xylose                                   | 0.488342 | 8047.249    | 19673.72933 | 0.40903526  |
| elcosapentaenoic acid                      | 0.023332 | 1629449     | 4408517.333 | 0.369613835 |
| FAD                                        | 0.018094 | 77560.21667 | 197938      | 0.391840964 |
| FMN                                        | 0.023869 | 3365.0549   | 12749.779   | 0.263930449 |
| fructose-1-6-bisphosphate                  | 0.005036 | 54984.26333 | 294831.6333 | 0.186493772 |

|                          |          |             |             |             |
|--------------------------|----------|-------------|-------------|-------------|
| fructose-6-phosphate     | 0.033012 | 4262002.667 | 8810896     | 0.483719552 |
| fumarate                 | 0.046029 | 974570.7    | 1764039     | 0.552465507 |
| Galacturonic acid        | 0.024545 | 4606.326    | 8464.049333 | 0.54422249  |
| GDP                      | 0.015311 | 22421.32333 | 58344.43    | 0.384292439 |
| glucose-1-phosphate      | 0.033012 | 4262002.667 | 8810896     | 0.483719552 |
| glucose-6-phosphate      | 0.033012 | 4262002.667 | 8810896     | 0.483719552 |
| Glutaconic acid          | 0.30304  | 72390.21667 | 136211.46   | 0.531454671 |
| glutamate                | 0.013958 | 11044842.33 | 22351583.33 | 0.494141384 |
| glutamine                | 0.63076  | 9337152     | 11873943.33 | 0.786356456 |
| Glutaric acid            | 0.956701 | 67647.37    | 66017.39667 | 1.024690058 |
| glutathione              | 0.010613 | 35839.37333 | 134991.8233 | 0.26549292  |
| glutathione disulfide    | 0.17063  | 353538.6333 | 649338.2    | 0.544459934 |
| glycerate                | 0.046001 | 13314.53767 | 43145.03667 | 0.308599521 |
| Glycerophosphocholine    | 0.626499 | 71015.03333 | 84712.21333 | 0.838309265 |
| glycine                  | 0.022099 | 933350.2333 | 2293335.333 | 0.406983758 |
| glycolate                | 0.34929  | 311200.1333 | 416521.1667 | 0.747141222 |
| Glycyl-L-leucine         | 0.023293 | 2509.478333 | 5540.224667 | 0.452956059 |
| Glycyl-L-tyrosine        | 0.011648 | 14598.14667 | 41180.09667 | 0.354495202 |
| glyoxylate               | 0.011222 | 69333.48667 | 113526.0333 | 0.610727642 |
| GMP                      | 0.067078 | 747333.6    | 1335441     | 0.559615588 |
| GTP                      | 0.184159 | 629.7895333 | 1414.459633 | 0.445250977 |
| Guaiacol                 | 0.361286 | 8334.032    | 14126.75333 | 0.589946735 |
| Guanidoacetic acid       | 0.196395 | 3188.650333 | 5172.199667 | 0.616497919 |
| guanosine                | 0.016968 | 1410569.667 | 3216161.333 | 0.438587969 |
| Homocarnosine            | 0.005992 | 4458141.667 | 17237496.67 | 0.258630459 |
| homoserine               | 0.003272 | 53538.53    | 244385.8    | 0.219073817 |
| Hydroxyindoleacetic acid | 0.126351 | 2740.958667 | 7454.480667 | 0.367692773 |
| hydroxyproline           | 0.090127 | 504577      | 930949.3667 | 0.542002624 |
| Hypotaurine              | 0.373901 | 0           | 309.1507333 | 0           |
| hypoxanthine             | 0.006841 | 4863196     | 9869963     | 0.492726872 |
| IDP                      | 0.025315 | 8841.269667 | 22418.32    | 0.394376995 |
| Imidazoleacetic acid     | 0.47154  | 11680.05667 | 15007.73133 | 0.778269307 |
| IMP                      | 0.821708 | 118779.39   | 131159.5333 | 0.905610038 |
| Indole-2-carboxylic acid | 0.167641 | 2318.096767 | 6452.980333 | 0.35922886  |
| Indole-3-acetaldehyde    | 0.266894 | 60539.08667 | 41947.99667 | 1.443193751 |
| Indole-3-lactic acid     | 0.943197 | 2565.338667 | 2303.882333 | 1.113485107 |
| inosine                  | 0.006553 | 26457163.33 | 63733136.67 | 0.415124137 |
| isoleucine               | 0.008241 | 291123.6667 | 605267.4    | 0.480983556 |
| ketoleucine              | 0.202881 | 334921.5667 | 239646.8667 | 1.397562886 |
| lactate                  | 0.049508 | 39021036.67 | 62486486.67 | 0.624471606 |
| Lactose                  | 0.347265 | 405706.6333 | 287488.1333 | 1.411211756 |
| L-Cysteic acid           | 0.547302 | 2117.123333 | 2792.635667 | 0.758109394 |
| leucine                  | 0.009071 | 1243246.667 | 2723996.667 | 0.456405355 |
| leucine                  | 0.009071 | 1243246.667 | 2723996.667 | 0.456405355 |
| L-Fucose                 | 0.133966 | 4725.643333 | 18603.132   | 0.254024072 |
| L-Hydroxyproline         | 0.012403 | 229809.9    | 787497.8667 | 0.291822886 |
| Linoleic acid            | 0.000573 | 17323293.33 | 31544226.67 | 0.549174767 |
| Lipoic acid              | 0.036888 | 35543.084   | 189841.5667 | 0.187224983 |
| L-Rhamnose               | 0.295101 | 5672.520333 | 10761.64667 | 0.527105239 |
| L-Threonic acid          | 0.004624 | 207363.3    | 736165.6333 | 0.281680223 |
| lysine                   | 0.008829 | 47218.04333 | 164176.9333 | 0.287604613 |
| malate                   | 0.02297  | 4850185.333 | 8582737     | 0.565109397 |
| Malonic acid             | 0.686768 | 703586.3667 | 878466.2333 | 0.800925909 |

|                           |          |             |             |              |
|---------------------------|----------|-------------|-------------|--------------|
| Mandelic acid             | 0.345484 | 18622.28    | 12843.2     | 1.44997197   |
| mannitol 1-phosphate      | 0.031829 | 2610.367667 | 10558.45367 | 0.24723011   |
| Mannose                   | 0.420633 | 19509.36667 | 27609.80333 | 0.706610128  |
| methionine                | 0.004167 | 104187.24   | 315406.6    | 0.330326759  |
| Methionine sulfoxide      | 0.314838 | 3840.751667 | 5694.501333 | 0.6744466725 |
| Methylmalonic acid        | 0.203377 | 1388631     | 1758649.333 | 0.789600845  |
| Mucic acid                | 0.007329 | 4048.033667 | 11471.84167 | 0.35286694   |
| Muramic acid              | 0.011332 | 4893.103667 | 29781.71333 | 0.164298931  |
| myo-inositol              | 0.004041 | 2462633.667 | 6888276.667 | 0.357510853  |
| Myristic acid             | 0.237902 | 28784733.33 | 41243346.67 | 0.697924287  |
| N-Acetylaspartic acid     | 0.068741 | 31249116.67 | 59385036.67 | 0.526211962  |
| N-acetylcysteine          | 0.147605 | 2602.454    | 7366.260333 | 0.353293786  |
| N-acetyl-glutamate        | 0.011049 | 90836.97667 | 279338.9333 | 0.325185521  |
| N-acetyl-glutamine        | 0.695011 | 11332.89533 | 8766.738    | 1.292715185  |
| N-Acetylglycine           | 0.028021 | 13389.49333 | 16426.61667 | 0.815109624  |
| N-Acetyl-L-alanine        | 0.012403 | 229809.9    | 787497.8667 | 0.291822886  |
| N-Acetyl-L-arginine       | 0.52159  | 2640.556333 | 3211.402667 | 0.822243925  |
| N-Acetyl-L-asparagine     | 0.380725 | 10383.1     | 12254.03333 | 0.847321018  |
| N-Acetyl-L-methionine     | 0.021624 | 37910.03667 | 79300.19    | 0.478057325  |
| N-acetyl-L-ornithine      | 0.747215 | 1756.905333 | 2173.523    | 0.808321482  |
| N-Acetyl-L-proline        | 0.342098 | 7259.524667 | 11040.255   | 0.657550452  |
| N-Acetylneuraminic acid   | 0.009178 | 114880.7133 | 391491.7    | 0.293443548  |
| N-Acetyltyrosine          | 0.53442  | 1702.025667 | 1325.1088   | 1.284442203  |
| NAD+                      | 0.077612 | 4193.755333 | 11013.689   | 0.380776626  |
| NADH                      | 0.373901 | 1110.665333 | 0           | #DIV/0!      |
| NADP+                     | 0.172353 | 1386.067333 | 3848.985333 | 0.360112397  |
| N-Formyl-L-methionine     | 0.012408 | 6076.024333 | 11817.52    | 0.514153929  |
| nicotinamide              | 0.089957 | 385657.3    | 695595      | 0.554427936  |
| N-Methyl-D-aspartic acid  | 0.013958 | 11044842.33 | 22351583.33 | 0.494141384  |
| O-acetyl-L-serine         | 0.092865 | 38036.62    | 76272.25333 | 0.498695375  |
| O-Phosphorylethanolamine  | 0.04073  | 752818.3333 | 1834410.333 | 0.410387098  |
| orotate                   | 0.425896 | 19838.248   | 10584.91633 | 1.874199793  |
| pantothenate              | 0.014651 | 544399.5667 | 994435.1    | 0.547446049  |
| phenylalanine             | 0.068375 | 444824      | 821311.1667 | 0.541602279  |
| Phenylglyoxylic acid      | 0.913831 | 37764.64333 | 35697.49667 | 1.057907329  |
| Phenyllactic acid         | 0.573653 | 27646.88333 | 21472.40333 | 1.287554211  |
| phosphocreatine           | 0.373901 | 0           | 195.0815667 | 0            |
| phosphoenolpyruvate       | 0.464635 | 2717.929    | 15138.15667 | 0.179541609  |
| Phosphorylcholine         | 0.028178 | 2923.683    | 5520.936333 | 0.52956289   |
| Pimelic acid              | 0.822784 | 30462.16    | 33912.64333 | 0.898253778  |
| Pipecolic acid            | 0.001724 | 1552.479333 | 4811.227333 | 0.322678441  |
| proline                   | 0.008886 | 267401.1667 | 687490.8667 | 0.388952319  |
| pyridoxamine-5-phosphate  | 0.000258 | 8870.145333 | 38796.45    | 0.228632912  |
| Pyroglutamic acid         | 0.025409 | 2251951     | 4778705.333 | 0.471247094  |
| pyruvate                  | 0.117741 | 433515.4333 | 691034.8    | 0.627342405  |
| Retinoic Acid             | 0.083157 | 99712.03333 | 1843198.833 | 0.054097275  |
| riboflavin                | 0.020271 | 5175.973667 | 17813.36    | 0.290566949  |
| ribose-5-phosphate        | 0.017062 | 343704.8667 | 1119994     | 0.306880989  |
| Ribothymidine             | 0.00058  | 18545.33333 | 34951.95    | 0.530595098  |
| Saccharic acid            | 0.007329 | 4048.033667 | 11471.84167 | 0.35286694   |
| S-adenosyl-L-homocysteine | 0.001848 | 44653.41667 | 144942.9667 | 0.308075774  |
| sarcosine                 | 0.00433  | 7180345.333 | 14314296.67 | 0.501620548  |
| Sebacic acid              | 0.992399 | 30977.03    | 30893.18    | 1.002714191  |

|                          |          |             |             |             |
|--------------------------|----------|-------------|-------------|-------------|
| serine                   | 0.005855 | 464532.3333 | 1070569.067 | 0.433911597 |
| shikimate                | 0.795562 | 12344.66667 | 14216.44133 | 0.868337327 |
| sn-glycerol-3-phosphate  | 0.196257 | 31020.38333 | 45347.39    | 0.684061053 |
| Stearic acid             | 0.210917 | 87888880    | 179133420   | 0.490633629 |
| Suberic acid             | 0.664074 | 24557.51    | 18324.935   | 1.34011444  |
| succinate                | 0.203377 | 1388631     | 1758649.333 | 0.789600845 |
| sucrose                  | 0.347265 | 405706.6333 | 287488.1333 | 1.411211756 |
| taurine                  | 0.00839  | 9314490     | 16581930    | 0.561725324 |
| thiamine-phosphate       | 0.042914 | 559.6674333 | 1879.254333 | 0.297813565 |
| threonine                | 0.003272 | 53538.53    | 244385.8    | 0.219073817 |
| thymidine                | 0.920526 | 14374.58567 | 13136.759   | 1.094226184 |
| trehalose-6-Phosphate    | 0.063659 | 7716.897667 | 36706.58    | 0.210231998 |
| Tricarballic acid        | 0.350054 | 56359.83    | 125877.2067 | 0.44773658  |
| tryptophan               | 0.029035 | 48983.96333 | 184078.4333 | 0.26610376  |
| tyrosine                 | 0.023045 | 47227.72333 | 210951.7    | 0.223879321 |
| UDP                      | 0.004466 | 4034.147333 | 2072.762333 | 1.946266231 |
| UDP-D-glucose            | 0.014532 | 364719.2333 | 961421.1667 | 0.379354279 |
| UDP-D-glucuronate        | 0.698972 | 30624.76333 | 36594.95333 | 0.836857559 |
| UDP-N-acetyl-glucosamine | 0.079183 | 862733.9333 | 1584307     | 0.54454972  |
| UMP                      | 0.903486 | 47009.88667 | 49959.83333 | 0.940953633 |
| Undecanoic acid          | 0.668481 | 303757.6333 | 374720      | 0.810625623 |
| uridine                  | 0.005085 | 3214379     | 8024239     | 0.400583657 |
| valine                   | 0.013961 | 383349.1667 | 738175.9333 | 0.519319514 |
| xanthine                 | 0.000431 | 1211219.067 | 3129421     | 0.387042545 |
| xanthosine               | 0.014296 | 7401.042    | 21152.31    | 0.349892849 |
| xanthosine               | 0.014296 | 7401.042    | 21152.31    | 0.349892849 |
| xanthosine-5-phosphate   | 0.146928 | 2297.528167 | 4006.68     | 0.573424423 |
